# Supplementary material for: Body Temperatures in Dinosaurs: What Can Growth Curves Tell Us?
Source: PLoS One. 2013 Oct 30;8(10):e74317. doi: 10.1371/journal.pone.0074317 (PMC3812988; doi:10.1371/journal.pone.0074317)
Supplement: Table S1 — Body mass and body temperature of crocodiles studied. (XLS) [file pone.0074317.s001.xls]

## Sheet: crocodiles
Supporting Information: Body masses and body temperature of crocodiles studied
Crocodylus porosus from Seebacher et al. 1999					Alligator mississipiensis from Seebacher et al. 2003
		body temperature (°C)						body temperature (°C)
Mass (kg)	Tb from this source	plus 25°C (average ambient temperature, see Gillooly et al. 2006)			Mass (kg)	Tb Summer	Tb Winter	average
32	0.498442	25.4984			1.59	29.92	15.0309	22.4754
42	0.581442	25.5814			3.8	29.92	15.6728	22.7964
77	0.819608	25.8196			4.1	29.92	15.7301	22.825
233	1.53451	26.5345			5	29.92	15.8806	22.9003
383	2.0334	27.0334			15	29.92	16.7405	23.3303
408	2.10754	27.1075			24	29.92	17.1225	23.5213
520	2.41792	27.4179			53.64	29.92	17.7964	23.8582
520	2.41792	27.4179
660	2.7675	27.7675
820	3.12955	28.1296
1010	3.52165	28.5216
