# Supplementary material for: Body Temperatures in Dinosaurs: What Can Growth Curves Tell Us?
Source: PLoS One. 2013 Oct 30;8(10):e74317. doi: 10.1371/journal.pone.0074317 (PMC3812988; doi:10.1371/journal.pone.0074317)
Supplement: Table S2 — Body mass and body temperature in birds. (XLS) [file pone.0074317.s002.xls]

## Sheet: birds
Supporting Information: Body masses and body temperature in birds
This dataset is taken without any modification from McNab (1966)!
Order	Genus	Species	Mass (kg)	body temperature (°C)
Sphenisciformes	Aptenodyptes	patagonica	20	37.7
Sphenisciformes	Aptenodyptes	forsteri	32	37.9
Sphenisciformes	Pygoscelis	papua	5	38.1
Sphenisciformes	Pygoscelis	adeliae	5.5	38.2
Sphenisciformes	Megadyptes	antipodes	3.7	37.8
Sphenisciformes	Eudyptula	minor	0.765	39
Struthioformes	Struthio	camelus	113	38.7
Casuariiformes	Casuaris sp.		17.6	39
Casuariiformes	Dromiceius	novae-hollandiae	43	39
Apterygiformes	Apteryx	australis	2.2	39
Tinamiformes	Nothura	maculosa	0.2	40.5
Podicepidiformes	Podiceps	caspicus	0.38	40.2
Procellariiformes	Diomedea	exulans	8.2	39.6
Procellariiformes	Diomedea	nigripes	3.1	38.1
Procellariiformes	Diomedea	immutabilis	2.5	37.5
Procellariiformes	Daption	capensis	0.45	39.1
Procellariiformes	Pachyptila	turtur	0.47	39.9
Procellariiformes	Puffinus	teniurostris	0.55	40.9
Procellariiformes	Pagodroma	nivea	0.27	38.7
Pelecaniformes	Pelecanus	occidentalis	3.5	40.3
Pelecaniformes	Morus	bassanus	2.95	41.4
Pelecaniformes	Phalacrocorax	auritus	2.72	40.1
Pelecaniformes	Phalacrocorax	carbo	3.63	39.8
Ciconiiformes	Ardea	herodias	1.85	39.5
Ciconiiformes	Jabiru	mycteria	5.47	40.1
Ciconiiformes	Leptoptilos	javanicus	5.71	39.6
Ciconiiformes	Phoenicopterus	antiquorum	3.04	40.2
Anseriformes	Cygnus	buccinator	8.88	40.1
Anseriformes	Branta	canadensis	3.8	41.1
Anseriformes	Domestic goose		5	41
Anseriformes	Anas	platyrhynchos	1.22	41.2
Anseriformes	Anas	cyanoptera	0.34	41.7
Anseriformes	Anas	carolinesis	0.36	41.2
Anseriformes	Anas	acuta	0.98	41.3
Anseriformes	Mareca	penelope	0.71	41.5
Anseriformes	Aythya	affinis	0.85	41.3
Anseriformes	Domestic duck		1.87	42.1
Falconiformes	Geranoaetus	melanoleucus	2.86	40.3
Falconiformes	Gypaetus	barbatus	5.07	39.7
Falconiformes	Falco	sparvarius	0.1	40.5
Galliformes	Lagopus	lagopus	0.62	41.7
Galliformes	Lophorytx	californicus	0.15	40.6
Galliformes	Lophorytx	gambelii	0.15	40.6
Galliformes	Domestic turkey		3.7	41.2
Galliformes	Domestic chicken		2	41.5
Gruiformes	Grus	canadensis	3.89	40.8
Gruiformes	Tetrapteryx/Anthropoides	paradisae	4.03	40.5
Charadriiformes	Charadrius	vociferus	0.076	41.7
Charadriiformes	Limosa	fedoa	0.25	40.7
Charadriiformes	Catoptrophorus	semipalmatus	0.222	41.4
Charadriiformes	Limnodromus	griseus	0.103	40.9
Charadriiformes	Ereunetes	mauri	0.024	41.8
Charadriiformes	Lobipes	lobatus	0.033	41.8
Charadriiformes	Catharacta	skua	1	41.2
Charadriiformes	Larus	glaucus	1.4	40.7
Charadriiformes	Rissa	tridactyla	0.46	41.5
Charadriiformes	Cepphus	grylle	0.5	40.4
Columbiformes	Domestic pigeon		0.3	42.2
Columbiformes	Zenaidura	macroura	0.123	42.5
Strigiformes	Bubo	virginianus	1.45	40.8
Apodiformes	Eupetomena	macroura	0.007	40.6
Apodiformes	Melanotrochilus	fuscus	0.0068	42.2
Apodiformes	Colibri	serrirostris	0.0039	42.5
Apodiformes	Lophornis	magnificus	0.0022	39.5
Apodiformes	Chlorestus	notatus	0.003	38.8
Apodiformes	Hylocharis	cyanus	0.003	38.8
Apodiformes	Thalurania	furcata	0.0041	39.6
Apodiformes	Polytmus	guainumbi	0.0053	41
Apodiformes	Amazilia	leucogaster	0.004	39.4
Apodiformes	Aphantochroa	cirrocholoris	0.0069	44.6
Apodiformes	Clytoaema	rubricauda	0.0068	42.2
Piciformes	Dendrocopos	pubescens	0.023	41.9
Passeriformes	Empidonax	flaviventris	0.014	42.3
Passeriformes	Eremophila	alpestris	0.043	43
Passeriformes	Riparia	riparia	0.014	41.4
Passeriformes	Parus	carolinensis	0.009	42.3
Passeriformes	Parus	cinctus	0.0125	41.5
Passeriformes	Telmatodytes	palustris	0.0105	41.6
Passeriformes	Mimus	polyglottos	0.04	42.7
Passeriformes	Turdus	migratorius	0.077	43.2
Passeriformes	Passer	domesticus	0.025	43.5
Passeriformes	Estrilda	troglodytes	0.0062	39.2
Passeriformes	Taeniopygia	castanotis	0.0117	40.2
Passeriformes	Richmondena	cardinalis	0.04	42.1
Passeriformes	Pipilio	fuscus	0.043	41.7
Passeriformes	Pipilio	alberti	0.047	42
Passeriformes	Junco	hyemalis	0.019	42.9
Passeriformes	Zonotrichia	leucophyrys	0.026	42
