# Supplementary material for: Body Temperatures in Dinosaurs: What Can Growth Curves Tell Us?
Source: PLoS One. 2013 Oct 30;8(10):e74317. doi: 10.1371/journal.pone.0074317 (PMC3812988; doi:10.1371/journal.pone.0074317)
Supplement: Table S4 — Body mass, maximum growth rate and source of data of reptiles studied. (XLS) [file pone.0074317.s004.xls]

## Sheet: Tabelle1
Supporting Information: Body masses, maximum growth rates, and source of data of reptiles studied
		Species	Body mass (kg)	Maximum growth rate (kg/day)	Source
REPTILES	LACERTILIA	Liolaemus multiformis	0.022	1e-05	Case (1978)
REPTILES	LACERTILIA	Phrynoscma solace	0.05	0.00025	Case (1978)
REPTILES	LACERTILIA	Iguana iguana	1.5	0.00021	Case (1978)
REPTILES	LACERTILIA	Sceloporus magister	0.028	6e-05	Case (1978)
REPTILES	LACERTILIA	Sceloporus undulatus	0.015	5e-05	Case (1978)
REPTILES	LACERTILIA	Sceloporus graciosus	0.006	2e-05	Case (1978)
REPTILES	LACERTILIA	Callisaurus draconoides	0.017	8.8e-05	Case (1978)
REPTILES	LACERTILIA	Dipsosaurus dorsalis	0.06	0.0001	Case (1978)
REPTILES	LACERTILIA	Sauromalus obesus	0.16	0.00014	Case (1978)
REPTILES	LACERTILIA	Uta stansburiana	0.005	4e-05	Case (1978)
REPTILES	LACERTILIA	Anolis acutus	0.005	1e-05	Case (1978)
REPTILES	LACERTILIA	Xantusia vigilis	0.003	2e-06	Case (1978)
REPTILES	LACERTILIA	Eumeces fasciatus	0.022	3e-05	Case (1978)
REPTILES	LACERTILIA	Emoia atrocostata	0.017	5e-05	Case (1978)
REPTILES	LACERTILIA	Leiolopisma zelandica	0.004	1e-05	Case (1978)
REPTILES	LACERTILIA	Cnemidophorus tigris	0.026	7e-05	Case (1978)
REPTILES	LACERTILIA	Cnemidophorus sexlineatus	0.006	0.0001	Case (1978)
REPTILES	LACERTILIA	Gyrrmopthatmus speciosus	0.002	3e-06	Case (1978)
REPTILES	SERPENTES	Boa constrictor	80	0.0024	Case (1978)
REPTILES	SERPENTES	Python reticulatus	60	0.0053	Case (1978)
REPTILES	SERPENTES	Python reticulatus	60	0.018	Case (1978)
REPTILES	SERPENTES	Python reticulatus	60	0.007	Case (1978)
REPTILES	SERPENTES	Python sebae	10	0.0096	Case (1978)
REPTILES	SERPENTES	Python molurus	40	0.0179	Case (1978)
REPTILES	SERPENTES	Elaphe subocularis	1.2	6e-05	Case (1978)
REPTILES	SERPENTES	Tharrmophis sirtalis	0.2	0.0001	Case (1978)
REPTILES	SERPENTES	Spalerosophis cliffordi	0.5	7e-05	Case (1978)
REPTILES	SERPENTES	Diadophis punctatus	0.05	1e-05	Case (1978)
REPTILES	SERPENTES	Coluber constrictor	0.2	0.00012	Case (1978)
REPTILES	SERPENTES	Heterodon platyrhinos	0.2	0.0005	Case (1978)
REPTILES	SERPENTES	Natrix erythrogaster	0.16	0.00086	Case (1978)
REPTILES	SERPENTES	Carphophis vermis	0.007	3.5e-05	Case (1978)
REPTILES	SERPENTES	Crotalus viridis	0.26	0.0001	Case (1978)
REPTILES	CHELONIA	Caretta caretta	165	0.0022	Case (1978)
REPTILES	CHELONIA	Caretta caretta	225	0.022	Case (1978)
REPTILES	CHELONIA	Geochelone elephantopus	200	0.016	Case (1978)
REPTILES	CHELONIA	Geochelone elephantopus	200	0.047	Case (1978)
REPTILES	CHELONIA	Clemmys guttata	0.17	0.0004	Case (1978)
REPTILES	CHELONIA	Chelonia mydas	270	0.0137	Case (1978)
REPTILES	CHELONIA	Chelonia mydas	270	0.0092	Case (1978)
REPTILES	CHELONIA	Gopherus agassizi	2.8	0.00168	Case (1978)
REPTILES	CHELONIA	Testudo sulcata	25	0.00087	Case (1978)
REPTILES	CHELONIA	Chrysemys picta	0.35	0.00012	Case (1978)
REPTILES	CROCODILIA	Alligator mississipiensis	160	0.027	Case (1978)
REPTILES	RHYNCHOCEPHALIA	Sphenodon punctatus	0.7	7e-05	Case (1978)
REPTILES	VARANIDAE	Varanus brevicauda	0.0123	1.8e-05	this study, SI
REPTILES	VARANIDAE	Varanus griseus	0.647	0.000447	this study, SI
REPTILES	VARANIDAE	Varanus varius	4.7	0.001281	this study, SI
REPTILES	VARANIDAE	Varanus niloticus	15.1711	0.007279	this study, SI
REPTILES	VARANIDAE	Varanus niloticus	6.2714	0.002969	this study, SI
REPTILES	VARANIDAE	Varanus niloticus	3.9458	0.001975	this study, SI
REPTILES	VARANIDAE	Varanus niloticus	3.9267	0.004249	this study, SI
REPTILES	VARANIDAE	Varanus niloticus	3.1886	0.003348	this study, SI
REPTILES	VARANIDAE	Varanus salvator	20	0.003636	this study, SI
REPTILES	VARANIDAE	Varanus salvator	20	0.005455	this study, SI
REPTILES	VARANIDAE	Varanus salvator	20	0.008354	this study, SI
REPTILES	VARANIDAE	Varanus komodoensis	40	0.016	this study, SI
REPTILES	VARANIDAE	Varanus komodoensis	87	0.018	this study, SI
REPTILES	CHELONIA	Geochelone sulcata	53.546	0.018	this study, SI
REPTILES	CHELONIA	Geochelone sulcata	55.632	0.015	this study, SI
REPTILES	CHELONIA	Geochelone sulcata	51.02	0.022	this study, SI
REPTILES	CROCODILIA	Crocodylus porosus	95.6232	0.00275	this study, SI
REPTILES	CROCODILIA	Alligator mississippiensis männlich	214.712	0.0236734	this study, SI
REPTILES	CROCODILIA	Alligator mississippiensis weiblich	76.337	0.0186841	this study, SI
REPTILES	CROCODILIA	Caiman crocodilus crocodilus	9.55095	0.00362069	this study, SI
REPTILES	CROCODILIA	Caiman latirostris	11.602	0.00120879	this study, SI
