# Supplementary material for: Body Temperatures in Dinosaurs: What Can Growth Curves Tell Us?
Source: PLoS One. 2013 Oct 30;8(10):e74317. doi: 10.1371/journal.pone.0074317 (PMC3812988; doi:10.1371/journal.pone.0074317)
Supplement: Table S5 — Body mass, maximum growth rate and source of data of dinosaurs studied. (XLS) [file pone.0074317.s005.xls]

## Sheet: Dinosaurs
Supporting Information: Body masses, maximum growth rates and source of data of dinosaurs studied
Dinosaur	Mass (kg)	Maximum growth rate (kg/day)	growth model	Source
Plateosaurus (N=12)	1587	0.8192	logistic	Griebeler, EM, Klein N, Sander PM (2003) Aging, maturation and growth of sauropodomorph dinosaurs as deduced from growth curves using long bone histological data: an assessment of methodological constrains and solutions. PLoS ONE 8(6) e67012. doi:10.1371/journal.pone.0067012
Plateosaurus (N=12)	1587	0.6805	logistic	Griebeler, EM, Klein N, Sander PM (2003) Aging, maturation and growth of sauropodomorph dinosaurs as deduced from growth curves using long bone histological data: an assessment of methodological constrains and solutions. PLoS ONE 8(6) e67012. doi:10.1371/journal.pone.0067012
cf. Mamenchisaurus (N=22)	25075	3.9077	logistic	Griebeler, EM, Klein N, Sander PM (2003) Aging, maturation and growth of sauropodomorph dinosaurs as deduced from growth curves using long bone histological data: an assessment of methodological constrains and solutions. PLoS ONE 8(6) e67012. doi:10.1371/journal.pone.0067012
Apatosaurus SMA0014 (N=20)	20206	4.0241	logistic	Griebeler, EM, Klein N, Sander PM (2003) Aging, maturation and growth of sauropodomorph dinosaurs as deduced from growth curves using long bone histological data: an assessment of methodological constrains and solutions. PLoS ONE 8(6) e67012. doi:10.1371/journal.pone.0067012
Apatosaurus BYU601-17328 (N=18)	18178	4.4214	logistic	Griebeler, EM, Klein N, Sander PM (2003) Aging, maturation and growth of sauropodomorph dinosaurs as deduced from growth curves using long bone histological data: an assessment of methodological constrains and solutions. PLoS ONE 8(6) e67012. doi:10.1371/journal.pone.0067012
indet.diplo MfM.R.2625 (N=9)	4753	0.9011	logistic	Griebeler, EM, Klein N, Sander PM (2003) Aging, maturation and growth of sauropodomorph dinosaurs as deduced from growth curves using long bone histological data: an assessment of methodological constrains and solutions. PLoS ONE 8(6) e67012. doi:10.1371/journal.pone.0067012
indet.diplo MfM.R.NW4 (N=16)	18463	2.3351	logistic	Griebeler, EM, Klein N, Sander PM (2003) Aging, maturation and growth of sauropodomorph dinosaurs as deduced from growth curves using long bone histological data: an assessment of methodological constrains and solutions. PLoS ONE 8(6) e67012. doi:10.1371/journal.pone.0067012
Camarasaurus CM3664 (N=9)	14247	4.1888	logistic	Griebeler, EM, Klein N, Sander PM (2003) Aging, maturation and growth of sauropodomorph dinosaurs as deduced from growth curves using long bone histological data: an assessment of methodological constrains and solutions. PLoS ONE 8(6) e67012. doi:10.1371/journal.pone.0067012
Alamosaurus (N=9)	32000	2.58904	von Bertalanffy	Lehman TM, Woodward HN (2008) Modelling growth rates for sauropod dinosaurs. Paleobiology 34: 264-281.
Alamosaurus (N=9)	32000	2.9863	von Bertalanffy	Lehman TM, Woodward HN (2008) Modelling growth rates for sauropod dinosaurs. Paleobiology 34: 264-281.
Alamosaurus (N=9)	32000	3.17808	von Bertalanffy	Lehman TM, Woodward HN (2008) Modelling growth rates for sauropod dinosaurs. Paleobiology 34: 264-281.
Psittacosaurus luijatunensis (N=20)	37.38	0.0139918	logistic	Erickson GM, Makovicky PJ, Inouye BD, Chang-Fu Z, Gao K-Q (2009b) A life table for Psittacosaurus lujiatunensis: initial insights into ornithischian population biology. Anat Rec 292: 1514-1521.
Psittacosaurus mongoliensis (N=7)	24	0.0159452	logistic	Erickson GM, Curry Rogers K, Yerby SA (2001) Dinosaurian growth patterns and rapid avian growth rates. Nature 412: 429-433.
Massospondylus carinatus (N=9)	280	0.0947945	logistic	Erickson GM, Curry Rogers K, Yerby SA (2001) Dinosaurian growth patterns and rapid avian growth rates. Nature 412: 429-433.
Albertosaurus sacrophagus (N=5)	1228	0.334247	logistic	Erickson GM, Currie PJ, Inouye BD, Winn AS (2004) Gigantism and comparative life-history parameters of tyrannosaurid dinosaurs. Nature 430: 772-775.
Gorgosaurus libratus (N=5)	1244	0.394521	logistic	Erickson GM, Currie PJ, Inouye BD, Winn AS (2004) Gigantism and comparative life-history parameters of tyrannosaurid dinosaurs. Nature 430: 772-775.
Tyrannosaurus rex (N=7)	5560	2.10137	logistic	Erickson GM, Currie PJ, Inouye BD, Winn AS (2004) Gigantism and comparative life-history parameters of tyrannosaurid dinosaurs. Nature 430: 772-775.
Archaeopterix (N=10)	0.9281	0.00187	logistic	Erickson GM, Rauhut OWM, Zhou Z, Turner AH, Inouye BD, Hu D, Norell MA (2009a) Was dinosaurian physiology inherited by birds? Reconciling slow growth in Archaeopteryx. PLoS ONE 4(10): doi:10.1371/journal.pone.0007390.
Archaeopterix (N=10)	0.9281	0.0022	logistic	Erickson GM, Rauhut OWM, Zhou Z, Turner AH, Inouye BD, Hu D, Norell MA (2009a) Was dinosaurian physiology inherited by birds? Reconciling slow growth in Archaeopteryx. PLoS ONE 4(10): doi:10.1371/journal.pone.0007390.
N: number of growth marks
